# Supplementary material for: Efficacy of environmental DNA metabarcoding in monitoring fish faunas in California estuaries and lagoons: a preliminary assessment
Source: Research Square preprint supplement (doi:10.21203/rs.3.rs-6436175/v1), 2025-07-07
Supplement: Supplementary file 1 [file 4f441ee4aee6a2ff14bcc66e.docx]

**Supplement 1. eDNA filtration, extraction, and sequencing**

|  |  |  |  | **Filtration** |  | **Extraction** | | |  | **PCR** |  | **Sequencing** |
| --- | --- | --- | --- | --- | --- | --- | --- | --- | --- | --- | --- | --- |
| **Site** | **Season** | **Station** | **Replicate** | **Number of filters** |  | **Half or full** | **Concentration of extracted DNA (ng/μL)** | **Concentration of pooled sample (ng/μL)** |  | **Concentration of PCR product (ng/μL)** |  | **Total reads** |
| Ten Mile River | Spring | 1 | 1 | 1 |  | Full | 3.83 | - |  | 7.07 |  | 315,232 |
| 2 | 1 |  | Full | 1.16 | - |  | 4.82 |  | 228,693 |
| 3 | 1 |  | Full | 0 | - |  | 17.3 |  | 164,401 |
| 2 | 1 | 1 |  | Full | 1 | - |  | 9.47 |  | 181,987 |
| 2 | 1 |  | Full | 0 | - |  | 5.85 |  | 479,400 |
| 3 | 1 |  | Full | 0 | - |  | 7.52 |  | 215,565 |
| 3 | 1 | 1 |  | Full | 1.67 | - |  | 9.21 |  | 276,279 |
| 2 | 1 |  | Full | 0 | - |  | 6.64 |  | 279,590 |
| 3 | 1 |  | Full | 0.484 | - |  | 5.47 |  | 330,222 |
| Fall | 1 | 1 | 1 |  | Half | 1.06 | - |  | 6.41 |  | 74,311 |
| 2 | 1 |  | Half | 1.14 | - |  | 8.12 |  | 215,828 |
| 3 | 1 |  | Half | 1.24 | - |  | 5.19 |  | 169,693 |
| 2 | 1 | 1 |  | Half | 2.14 | - |  | 11.8 |  | 111,268 |
| 2 | 1 |  | Half | 2.58 | - |  | 11.1 |  | 220,491 |
| 3 | 1 |  | Half | 2.19 | - |  | 12.1 |  | 77,510 |
| 3 | 1 | 1 |  | Half | 0 | - |  | 7.15 |  | 196,309 |
| 2 | 1 |  | Half | 1 | - |  | 13.9 |  | 218,979 |
| 3 | 1 |  | Half | 1.07 | - |  | 11.5 |  | 251,092 |
| Pajaro River | Spring | 1 | 1 | 1 |  | Half | 5.92 | - |  | 26.7 |  | 238,525 |
| 2 | 1 |  | Half | 4.89 | - |  | 21.3 |  | 229,414 |
| 3 | 1 |  | Half | 5.87 | - |  | 18.9 |  | 267,153 |
| 2 | 1 | 2 |  | Half | 4.85 / 1.01 | 3.2 |  | 12.6 |  | 148,946 |
| 2 | 1 |  | Half | 1.64 | - |  | 30.4 |  | 326,673 |
| 3 | 1 |  | Half | 4.41 | - |  | 30.5 |  | 200,069 |
| 3 | 1 | 1 |  | Half | 2.51 | - |  | 6.25 |  | 179,801 |
| 2 | 1 |  | Half | 1.72 | - |  | 7.04 |  | 252,847 |
| 3 | 1 |  | Half | 2.2 | - |  | 16.8 |  | 185,680 |

**Sup 1 Table 1. Filtration, extraction, PCR, and sequencing data for each sample.**

|  |  |  |  | **Filtration** |  | **Extraction** | | |  | **PCR** |  | **Sequencing** |
| --- | --- | --- | --- | --- | --- | --- | --- | --- | --- | --- | --- | --- |
| **Site** | **Season** | **Station** | **Replicate** | **Number of filters** |  | **Half or full** | **Concentration of extracted DNA (ng/μL)** | **Concentration of pooled sample (ng/μL)** |  | **Concentration of PCR product (ng/μL)** |  | **Total reads** |
| Pajaro Lagoon | Fall | 1 | 1 | 2 |  | Half | 5.09 / 6.78 | 6.75 |  | 3.75 |  | 85,670 |
| 2 | 2 |  | Half | 4.37 / 4.56 | 8.68 |  | 15.9 |  | NA |
| 3 | 2 |  | Half | 8.13 / 6.55 | 9.36 |  | 14.5 |  | 165,645 |
| 2 | 1 | 2 |  | Half | 26.8 / 20.1 | 26.2 |  | 12.1 |  | 178,714 |
| 2 | 2 |  | Half | 43 / 11.8 | 35.3 |  | 12 |  | 222,157 |
| 3 | 2 |  | Half | * | 49.4 |  | 19 |  | 97,734 |
| 3 | 1 | 2 |  | Half | * | 29.3 |  | 20.9 |  | 194,618 |
| 2 | 2 |  | Half | * | 74.9 |  | 10.2 |  | 226,446 |
| 3 | 1 |  | Half | 56.1 | - |  | 26.7 |  | 79,577 |
| Malibu Lagoon | Spring | 1 | 1 | 1 |  | Full | 3.37 | - |  | 18.6 |  | 283,538 |
| 2 | 1 |  | Full | 10.3 | - |  | 5.45 |  | 397,982 |
| 3 | 1 |  | Full | 7.6 | - |  | 3.01 |  | 245,141 |
| 2 | 1 | 1 |  | Full | 10.4 | - |  | 19.2 |  | 235,147 |
| 2 | 1 |  | Full | 8.22 | - |  | 16.4 |  | 257,541 |
| 3 | 1 |  | Full | 21.4 | - |  | 20.4 |  | 219,999 |
| 3 | 1 | 1 |  | Full | 6.62 | - |  | 30.9 |  | 258,040 |
| 2 | 1 |  | Full | 3.57 | - |  | 7.27 |  | 41,627 |
| 3 | 1 |  | Full | 3.82 | - |  | 16.4 |  | 318,020 |
| Fall | 1 | 1 | 2 |  | Half | * | 2.22 |  | 12 |  | 237,890 |
| 2 | 2 |  | Half | * | 2.35 |  | 3.36 |  | 187,044 |
| 3 | 2 |  | Half | * | 1.64 |  | 11.5 |  | 178,592 |
| 2 | 1 | 2 |  | Half | * | 2.13 |  | 3.39 |  | 394,375 |
| 2 | 2 |  | Half | * | 4.07 |  | 13.4 |  | 278,715 |
| 3 | 2 |  | Half | * | 3.69 |  | 13.3 |  | 323,111 |
| 3 | 1 | 2 |  | Half | * | 2.39 |  | 15 |  | 174,393 |
| 2 | 2 |  | Half | * | 2.57 |  | 8.53 |  | 205,541 |
| 3 | 2 |  | Half | * | 1.34 |  | 4.5 |  | 73,284 |
| Batiquitos Lagoon | Spring | 1 | 1 | 1 |  | Full | 4.53 | - |  | 10.8 |  | 307,411 |
| 2 | 2 |  | Full | 3.21 / 0 | 1.37 |  | 24 |  | 104,091 |
| 3 | 1 |  | Full | 3.92 | - |  | 8.33 |  | 154,028 |

**Sup 1 Table 1. Filtration, extraction, PCR, and sequencing data for each sample (continued from previous page).**

|  |  |  |  | **Filtration** |  | **Extraction** | | |  | **PCR** |  | **Sequencing** |
| --- | --- | --- | --- | --- | --- | --- | --- | --- | --- | --- | --- | --- |
| **Site** | **Season** | **Station** | **Replicate** | **Number of filters** |  | **Half or full** | **Concentration of extracted DNA (ng/μL)** | **Concentration of pooled sample (ng/μL)** |  | **Concentration of PCR product (ng/μL)** |  | **Total reads** |
| Batiquitos Lagoon | Spring | 2 | 1 | 1 |  | Full | 2.39 | - |  | 7.68 |  | 307,317 |
| 2 | 1 |  | Full | 3.8 | - |  | 0 |  | NA |
| 3 | 1 |  | Full | 3.8 | - |  | 0 |  | 117,707 |
| 3 | 1 | 2 |  | Full | 7.81 / 5.17 | 5.53 |  | 10.9 |  | 226,141 |
| 2 | 2 |  | Full | 9.33 / 2.7 | 5.49 |  | 14.6 |  | 262,293 |
| 3 | 2 |  | Full | 4.87 / 4.1 | 4.96 |  | 14.3 |  | 223,564 |
| Fall | 1 | 1 | 1 |  | Half | 1.02 | - |  | 18.6 |  | 159,754 |
| 2 | 1 |  | Half | 0 | - |  | 18.4 |  | 122,188 |
| 3 | 1 |  | Half | 1.21 | - |  | 3.51 |  | 336,165 |
| 2 | 1 | 1 |  | Half | 0 | - |  | 6.5 |  | 65,974 |
| 2 | 1 |  | Half | 1.25 | - |  | 1.36 |  | 57,988 |
| 3 | 1 |  | Half | 1.06 | - |  | 3.32 |  | 79,469 |
| 3 | 1 | 1 |  | Half | 0 | - |  | 0 |  | 378,052 |
| 2 | 1 |  | Half | 0 | - |  | 0 |  | 97,295 |
| 3 | 1 |  | Half | 1.06 | - |  | 2.37 |  | 50,616 |

**Sup 1 Table 1. Filtration, extraction, PCR, and sequencing data for each sample (continued from previous page).** “Number of filters” indicates the number of filters used to process each water sample. “Half or full” indicates whether all or half of a filter was used during extraction. “Concentration of extracted DNA” is the concentration of DNA quantified from each sample following extraction, with measurements from multiple filters separated by a forward slash (/). In some cases, extractions from multiple filters were not quantified before being pooled–these samples are marked by asterisks. “Concentration of pooled sample” is the concentration of DNA quantified from extractions pooled from samples with multiple filters. “Concentration of PCR product” is the concentration of DNA quantified from the pool of the three metabarcoding replicates associated with each sample. Finally, “Total reads” is the number of reads, prior to downstream data filtration, sequenced from each sample. NA’s indicate that a sample was not ultimately sequenced.

We compared the DNA recovery between filtration (i.e. multiple versus single filters) and extraction (i.e. half versus full filters) methods to evaluate their possible impact on downstream results. eDNA recovery was calculated as the concentration of the sample as measured by Qubit multiplied by the extraction volume. If the concentration was below the threshold of detection by Qubit (0.2 ng/uL), it was given a concentration of 0.2 ng/uL in calculations. After confirming no violation of assumptions, we ran an ANOVA using filter number (multiple versus single), size (half versus full), and the interaction between these two factors as predictors of Box-Cox-transformed eDNA recovery. Following this, we used a Wilcoxon signed-rank test to compare eDNA recovery between consecutive filters used in multi-filter filtrations. Extractions from multiple filters that were quantified after being pooled were excluded from this analysis.

|  | **ANOVA results** | | | | |
| --- | --- | --- | --- | --- | --- |
| **Variable** | **df** | **Sum Sq** | **Mean Sq** | **F** | **p** |
| Filter number | 2 | 110.1 | 55.06 | 8.031 | **0.0008** |
| Filter size | 1 | 1.1 | 1.1 | 0.161 | 0.689 |
| Number * Size | 2 | 37.3 | 18.65 | 2.72 | 0.073 |
| Residuals | 64 | 438.8 | 6.86 |  |  |

**Sup 1 Table 2. ANOVA table for effect of filter number, filter size, and interaction between number and size on eDNA recovery.** Number of filters used during filtration significantly affected the amount of eDNA recovered after extraction.

|  | | |  | **Tukey test results** | | | |
| --- | --- | --- | --- | --- | --- | --- | --- |
| **Pairwise comparison** | | |  | **Difference** | **Lower Bound** | **Upper Bound** | **p** |
| single filter | *×* | first filter |  | -3.449896 | -5.626264 | -1.2735278 | **0.000926** |
|  | *×* | second filter |  | -1.704484 | -3.880852 | 0.4718839 | 0.1530094 |
| first filter | *×* | second filter |  | 1.745412 | -1.064267 | 4.5550907 | 0.302187 |

**Sup 1 Table 3. Tukey table for effect of filter number on eDNA recovery.** “Single filter” corresponds to samples that required only one filter to process all 500mL of sample. “First” and “second filter” correspond to samples that required two filters to process all 500mL of sample: filters used “first” clogged before the sample was fully processed, while filters used “second” processed the remaining volume of the sample without clogging. Only “single” and “first” filters yielded significantly different amounts of eDNA. This is likely because “first” filters processed a larger amount of organic material, to the point of clogging, than “single” filters.

| **Comparison groups** | |  | **Wilcoxon signed-rank test results** | | |
| --- | --- | --- | --- | --- | --- |
| **Group 1** | **Group 2** |  | **df** | **V** | **p** |
| First filter | Second filter |  | 9 | 50 | **0.01953** |

**Sup 1 Table 4. Wilcoxon signed-rank test table comparing eDNA recovery between first and second filters.** Despite Tukey results, the Wilcoxon signed-rank test indicated that recovery from “first” and “second” filters were significantly different. “First” filters tended to process a larger volume of sample than “second” filters, and potentially a larger amount of organic material.

| **Primer Sequences** | | | | | | |
| --- | --- | --- | --- | --- | --- | --- |
| **Primer** | **Target** | **Forward primer** | |  | **Reverse primer** | |
| **Name** | **Sequence** |  | **Name** | **Sequence** |
| MiFish-U (Miya et al. 2015) | Fish | MiFish-U F | GTCGGTAAAACTCGTGCCAGC |  | MiFish-U R | CATAGTGGGGTATCTAATCCCAGTTTG |
|  |  |  |  |  |  |  |
| **PCR Protocol** | | | | | | |
| **Reagent** | **Volume (uL)** |  |  |  |  |  |
| Multiplex mm | 12.5 |  |  |  |  |  |
| H2O | 7.5 |  |  |  |  |  |
| Forward primer | 1 |  |  |  |  |  |
| Reverse primer | 1 |  |  |  |  |  |
| Template | 1 |  |  |  |  |  |
| Total volume | 24 |  |  |  |  |  |
|  |  |  |  |  |  |  |
| **Thermocycler Protocol** | | | | | | |
| **Step** | **Cycles** | **Temperature** | |  | **Time** |  |
| *Initial denature* | 1 | 95°C | |  | 15 min |  |
| *Touchdown* | 13 | - | |  | - |  |
| Denature | 94°C | |  | 30 sec |  |
| Anneal | 69.5°C  (-1.5°C each cycle) | |  | 30 sec |  |
| Extension | 72°C | |  | 90 sec |  |
| *Main cycle* | 25 | - | |  | - |  |
| Denature |  | 94°C | |  | 30 sec |  |
| Anneal |  | 50°C | |  | 30 sec |  |
| Extension |  | 72°C | |  | 45 sec |  |
| *Final cycle* | 1 | - | |  | - |  |
| Final extension |  | 72°C | |  | 10 min |  |
| Hold |  | 10°C | |  | forever |  |

**Sup 1 Table 5. Primer, PCR, and thermocycler information.**

**Literature Cited**

Miya M, Sato Y, Fukunaga T, Sado T, Poulsen JY, Sato K, Minamoto T, Yamamoto S, Yamanaka H, Araki H, Kondoh M, Iwasaki W (2015) MiFish, a set of universal PCR primers for metabarcoding environmental DNA from fishes: Detection of more than 230 subtropical marine species. R Soc Open Sci 2:150088. http://dx.doi.org/10.1098/rsos.150088
