# Supplementary material for: Efficacy of environmental DNA metabarcoding in monitoring fish faunas in California estuaries and lagoons: a preliminary assessment
Source: Research Square preprint supplement (doi:10.21203/rs.3.rs-6436175/v1), 2025-07-07
Supplement: Supplementary file 2 [file 55cce8752e2697bea94e8f44.docx]

**Supplement 3. Data cleaning**

| **Step** | **Explanation** | **Number of replicates** | **Number of species** | **Number of ASVs** | **Number of reads** |
| --- | --- | --- | --- | --- | --- |
| *Samples and controls* | | | | | |
| Raw data | Raw taxonomy table from Anacapa | 70 | - | 95,391 | 15,654,126 |
| Chordates only | Remove unknowns, bacteria | 70 | - | 34,456  (-60,935) | 11,229,727  (-4,442,399) |
| Gruinard Step 0 | Merged reads only, no singletons | 70 | - | 368  (-34,088) | 10,458,131  (-771,596) |
| *Samples only* | | | | | |
| Gruinard Step 1 | Address tag-jumping, sample cross-talk | 70 | - | 366  (-2) | 10,452,991  (-5,140) |
| Gruinard Step 2 | Remove reps with low reads | 69  (-1) | - | 365  (-1) | 10,450,453  (-2,538) |
| Gruinard Step 3 | Address negative contaminants | 69 | 95 | 365 | 7,762,688  (-2,687,765) |
| Fish only | Remove non-fish ASVs | 69 | 65  (-30) | 315  (-50) | 7,694,502  (-68,186) |
| Read threshold | Remove observations with reads below 20 | 69 | 64  (-1) | 314  (-1) | 7,694,259  (-243) |

**Sup 3 Table 3. Number of replicates, species, ASVs, and reads present during each step of data cleaning/filtration.** “Gruinard”refers to the Gruinard decontamination pipeline (Gold 2020). Numbers are listed in black, with changes between steps listed in grey. Number of species was only recorded after Gruinard Step 3, at which point ASVs were merged into single species.

**Literature Cited**

Gold Z (2020) Gruinard decon. GitHub. https://github.com/zjgold/gruinard_decon. Accessed 06 April 2025
