# Supplementary material for: Efficacy of environmental DNA metabarcoding in monitoring fish faunas in California estuaries and lagoons: a preliminary assessment
Source: Research Square preprint supplement (doi:10.21203/rs.3.rs-6436175/v1), 2025-07-07
Supplement: Supplementary file 3 [file 967f5e56bb20b78bacd33397.docx]

**
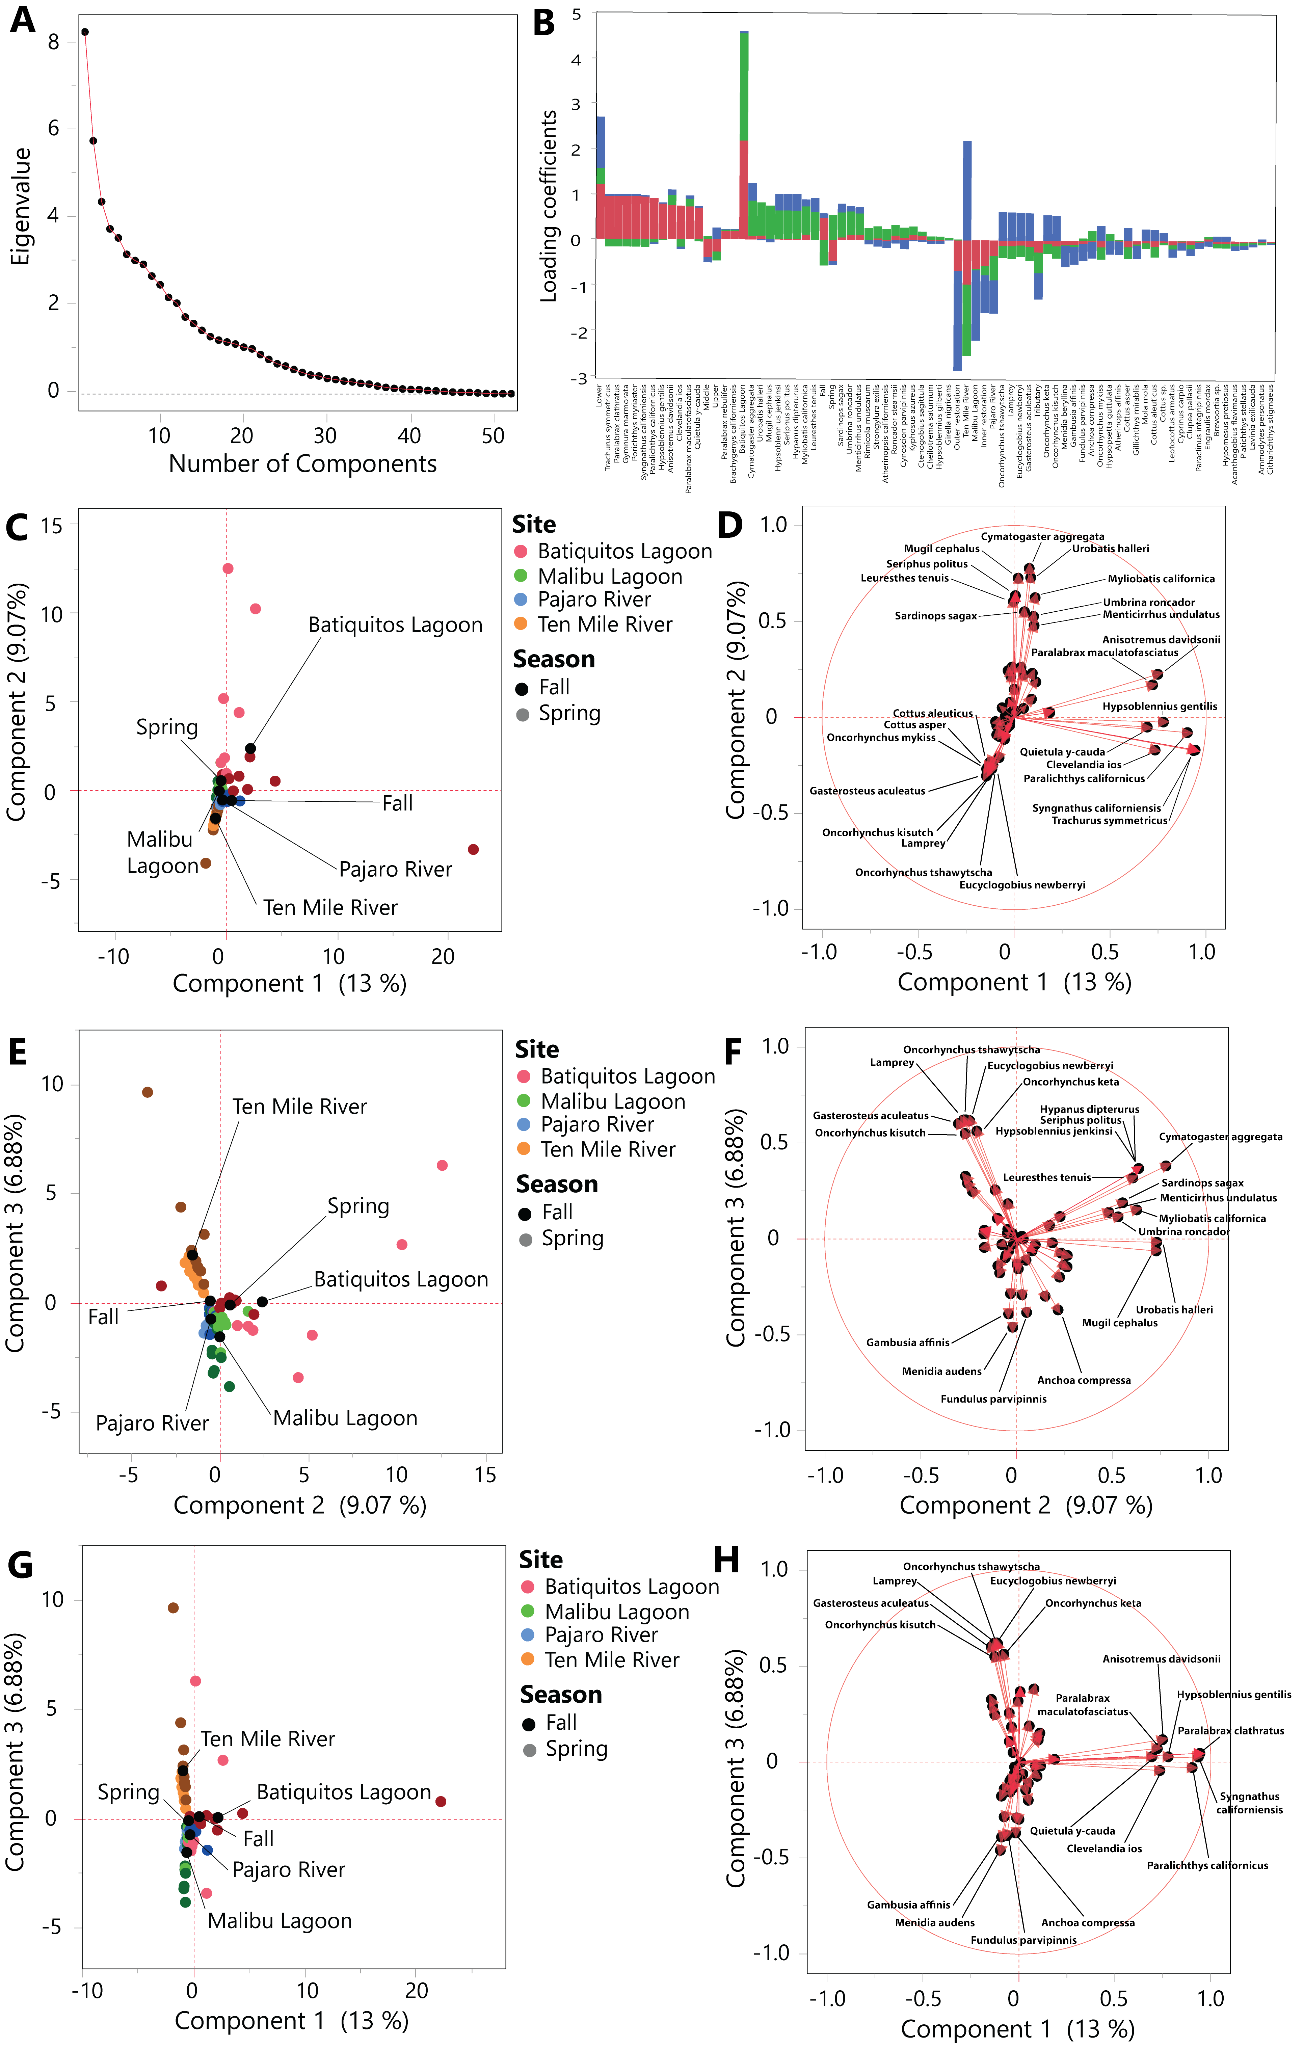
**

**Sup 4 Figure 1. Principal components analysis (PCA) of eDNA species data (on previous page).** A shows a scree plot, with dots representing eigenvalues at various numbers of principal components. B is a stacked bar graph displaying the loading coefficients for each species on the first three components, with Component 1 represented in red, Component 2 represented in green, and Component 3 represented in blue. C, E, and G plot the location of eDNA samples in relation to Components 1 and 2, Components 2 and 3, and Components 1 and 3, respectively. Colors separate samples by site, while values (darker and lighter) separate samples by season. Labeled points in black correspond to the values of two supplementary (Z) variables, site, station, and season. D, F, and G display the loadings of species on biplots for Components 1 and 2, Components 2 and 3, and Components 1 and 3, respectively.

We used JMP to run a PCA on our eDNA species data using default settings, adding sample site and season as supplementary variables. We focused on the first three components of this analysis according to the appearance of our scree plot (Sup 4 Fig 1A). Component 1 appeared to relate to latitude, contrasting more southern-associated species in our data (e.g. *Anisotremus davidsonii*, *Hypsoblennius gentilis*, *Syngnathus californiensis*) with more northern ones (e.g. *Cottus asper*, *Cottus aleuticus*, *Oncorhynchus* spp.) (Sup 4 Fig 1B, D, H). Supplementary variable plots support this, with samples from Batiquitos Lagoon and Ten Mile River being most opposed on Component 1 (Sup 4 Fig 1C, G). Component 2 appeared to relate to a combination of latitude and season, contrasting southern, spring-associated species (e.g. *Mugil cephalus*, *Cymatogaster aggregata*, *Urobatis halleri*) against northern, fall-associated species (e.g. *Eucyclogobius newberryi*, *Oncorhynchus* spp., lamprey) (Sup 4 Fig 1B, D, F). Consistent with this, supplementary variable plots separate spring Batiquitos samples from Ten Mile samples generally. Component 3 appeared to relate to Ten Mile’s differences from Pajaro River and Malibu Lagoon, contrasting northern taxa (e.g. *Oncorhynchus* spp., lamprey, *E. newberryi*) to those more associated with the mid or southern coast (e.g. *Gambusia affinis*, *Menidia audens*, *Fundulus parvipinnis*) (Sup 4 Fig 1B, F, H). This difference may reflect that Ten Mile is less impacted by human activity than Pajaro and Malibu, as it has MPA protection and low levels of eutrophication compared to the latter two sites. While Batiquitos has similar protections, its urban location makes it more impacted than Ten Mile, potentially explaining why it does not load as positively on the same axis (Sup 4 Fig 1G).

| **Species** | **NMDS1** | **NMDS2** | **NMDS3** | **NMDS4** |
| --- | --- | --- | --- | --- |
| Acanthogobius flavimanus | -0.180023329 | -0.35486424 | 1.431521051 | -0.524771434 |
| Ammodytes personatus | **-1.780429715** | 0.805806736 | 0.306787195 | 1.106332819 |
| Anchoa compressa | 0.688797538 | -0.310754703 | -0.98802972 | 0.377621769 |
| Anisotremus davidsonii | 1.404267469 | 1.49342145 | 0.297964807 | 0.067715518 |
| Atherinops affinis | 0.276284499 | -0.632904843 | 0.393461057 | 0.504242352 |
| Atherinopsis californiensis | 0.547867605 | -0.558842168 | 0.076656587 | -0.559691744 |
| Brachygenys californiensis | **1.859325642** | **1.740724954** | 0.437210815 | 0.683292519 |
| Brevoortia sp. | **-1.66311356** | 1.020562688 | 0.219915002 | -0.769479225 |
| Cheilotrema saturnum | **1.579011399** | 0.198909834 | -0.774037363 | -0.336944734 |
| Citharichthys stigmaeus | 0.994875273 | 0.410631521 | 0.025162227 | **-1.833771203** |
| Clevelandia ios | -0.234588582 | -0.711390953 | 0.587281122 | 0.523105617 |
| Clupea pallasii | -0.363098147 | -0.552127833 | 1.23586457 | -0.413961606 |
| Cottus aleuticus | -1.348523223 | 0.583608535 | -0.065915461 | -0.655875171 |
| Cottus asper | -1.403781142 | 0.481468785 | -0.043040462 | -0.475558154 |
| Cottus sp. | -0.966979799 | 1.012411107 | -0.538175344 | 0.706714259 |
| Ctenogobius sagittula | **1.575477455** | **1.646214757** | -0.702563262 | 0.070649304 |
| Cymatogaster aggregata | -0.032372244 | 0.343877337 | 0.369754414 | -0.068627183 |
| Cynoscion parvipinnis | 1.144121947 | 0.415478296 | -0.724497573 | 0.792161996 |
| Cyprinus carpio | 0.644050427 | -0.727091493 | -0.016277997 | -0.256603645 |
| Lamprey | -1.323888157 | 0.644598359 | -0.476994493 | 0.33050994 |
| Engraulis mordax | 0.585189975 | -0.339416747 | 0.444793294 | 0.379112708 |
| Eucyclogobius newberryi | -0.618978689 | 0.411405009 | -0.479336844 | 0.817382763 |
| Fundulus parvipinnis | 0.417800897 | -0.566868297 | -0.879635202 | -0.262201389 |
| Gambusia affinis | 0.13154566 | -0.69910457 | -1.186915378 | -0.085577731 |
| Gasterosteus aculeatus | -1.390228942 | 0.350227987 | -0.086874255 | 0.143862305 |
| Gillichthys mirablis | 0.281411176 | -0.657388814 | -0.72782789 | 0.04540951 |
| Girella nigricans | 0.512569359 | **1.513426057** | 0.131978208 | 0.385290832 |
| Gymnura marmorata | 0.592863575 | 1.202554526 | 0.727785273 | 1.012120251 |
| Hypanus dipterurus | 0.867549185 | 0.92348098 | -0.118808504 | -1.133855106 |
| Hypomesus pretiosus | **-1.66311356** | 1.020562688 | 0.219915002 | -0.769479225 |
| Hypsoblennius gentilis | **1.626521782** | 1.179486712 | 0.929561902 | 0.083597303 |
| Hypsoblennius gilberti | **1.579011399** | 0.198909834 | -0.774037363 | -0.336944734 |
| Hypsoblennius jenkinsi | 0.867549185 | 0.92348098 | -0.118808504 | -1.133855106 |
| Hypsopsetta guttulata | 0.775495977 | -0.234086481 | -1.065015551 | 0.333108693 |
| Kyphosus azureus | 1.48097879 | 0.917384497 | -0.048297658 | -0.112203442 |
| Lavinia exilicauda | -0.489862077 | -0.871958301 | **1.568346322** | -0.432701494 |
| Leptocottus armatus | -0.13303322 | -0.685445438 | 0.708646624 | -0.174016544 |
| Leuresthes tenuis | 0.289455931 | -0.44606416 | 0.174504729 | -0.308625803 |
| Menidia audens | 0.290834121 | -0.667104816 | -0.924960457 | -0.215469296 |
| Menticirrhus undulatus | 0.660234389 | 1.356125648 | 0.106583007 | 0.103914427 |
| Mola mola | -1.136136688 | 0.634099583 | -0.529334101 | 1.19568747 |
| Mugil cephalus | 0.841752363 | -0.243144299 | -0.232259276 | -0.136975161 |
| Myliobatis californica | 1.139958686 | 0.490594084 | -0.234752485 | -0.144195307 |
| Oncorhynchus keta | -1.409051067 | 0.534997572 | -0.327586862 | 1.399667312 |
| Oncorhynchus kisutch | **-1.53835849** | 0.322814282 | -0.262287881 | 0.334380835 |
| Oncorhynchus mykiss | -1.400890765 | 0.531017898 | -0.146474917 | -0.356230822 |
| Oncorhynchus tshawytscha | -1.361802624 | 0.698221496 | -0.126484171 | 0.786695747 |
| Paraclinus integripinnis | 0.624070828 | -0.968544509 | 0.031393039 | -0.142265973 |
| Paralabrax clathratus | 0.592863575 | 1.202554526 | 0.727785273 | 1.012120251 |
| Paralabrax maculatofasciatus | **1.595547729** | **1.740299897** | 0.287906994 | 0.151714519 |
| Paralabrax nebulifer | **1.859325642** | **1.740724954** | 0.437210815 | 0.683292519 |
| Paralichthys californicus | 0.848632983 | 0.837371825 | 0.053964171 | 0.910065397 |
| Platichthys stellatus | -0.008744818 | -0.135853592 | 0.989822801 | 0.590939489 |
| Porichthys myriaster | 0.592863575 | 1.202554526 | 0.727785273 | 1.012120251 |
| Quietula y-cauda | 1.38473188 | 0.958490233 | 0.303680173 | 0.462190303 |

**Sup 4 Table 1. Loadings for each species on NMDS axes.**

| **Species** | **NMDS1** | **NMDS2** | **NMDS3** | **NMDS4** |
| --- | --- | --- | --- | --- |
| Rimicola muscarum | 1.202279547 | 0.202573771 | -0.177993401 | -1.060982069 |
| Roncador stearnsii | 1.420186856 | 0.696824387 | -0.462408756 | 0.030396958 |
| Syngnathus californiensis | 0.401929647 | 0.071668502 | 0.430248263 | 1.236112068 |
| Sardinops sagax | 1.37678655 | 0.180170852 | 0.240413238 | -0.525437355 |
| Seriphus politus | 0.867549185 | 0.92348098 | -0.118808504 | -1.133855106 |
| Strongylura exilis | 1.334395378 | 0.222269855 | -0.557698528 | 0.69776499 |
| Trachurus symmetricus | 0.592863575 | 1.202554526 | 0.727785273 | 1.012120251 |
| Umbrina roncador | 1.109585422 | 0.502846864 | -0.222885108 | 0.101724614 |
| Urobatis halleri | 1.246337413 | 0.576040606 | -0.147368802 | -0.145464622 |

**Sup 4 Table 1. Loadings for each species on NMDS axes (continued from previous page).** Higher loadings, both positive and negative, are listed in darker, bolder font.
