# Supplementary material for: Efficacy of environmental DNA metabarcoding in monitoring fish faunas in California estuaries and lagoons: a preliminary assessment
Source: Research Square preprint supplement (doi:10.21203/rs.3.rs-6436175/v1), 2025-07-07
Supplement: Supplementary file 4 [file af62a23495d454e019c5ff20.docx]

**Supplement 5. Literature comparison**

| **Species** | **Source** | **Location** | **Reason for exclusion** |
| --- | --- | --- | --- |
| Cottus sp. | eDNA list | Ten Mile River | Unable to identify species, so difficult to compare observation with literature |
| Acipenser medirostrus | Regional list, Allen et al. 2006 | North coast | Reported from Sacramento, Klamath, and Trinity drainages (Adams et al. 2009) |
| Acipenser transmontanus | Regional list, Allen et al. 2006 | North coast | Reports in estuaries are nearby spawning streams (Hildebrand et al. 2016), which in California are limited to the Sacramento and San Joaquin drainages (Moyle 2002) |
| Hypomesus transpacificus | Regional list, Allen et al. 2006 | North coast | Endemic to San Francisco Bay (Allen et al. 2006) |
| Hypomesus nipponensis | Regional list, Allen et al. 2006 | North coast | Mainly reported north of Cape Mendocino and San Francisco Bay southwards (Fuller 2025) |
| Lampetra richardsoni | Regional list, Allen et al. 2006 | North coast | Likely synonymous with Lampetra ayresii (Carim et al. 2023) |
| Lucania parva | Regional list, Allen et al. 2006 | North coast | Estuarine reports in northern California limited to San Francisco Bay (Fuller and Nielson 2025) |
| Oncorhynchus gorbuscha | Regional list, Allen et al. 2006 | North coast | Extirpated from California (Allen et al. 2006) |
| Spirinchus thaleichthys | Regional list, Allen et al. 2006 | North coast | Distribution in California limited to San Francisco Bay and systems north of Cape Mendocino (Saglam et al. 2021) |
| Thaleichthys pacificus | Regional list, Allen et al. 2006 | North coast | Freshwater distribution in California limited to Humboldt Bay northwards, with the exception of the Russian and Sacramento Rivers (Willson et al. 2006) |
| Tridentiger barbatus | Regional list, Allen et al. 2006 | North coast | Reports from Northern California are limited to San Francisco Bay (Nico et al. 2025a) |
| Tridentiger bifasciatus | Regional list, Allen et al. 2006 | North coast | Reports from Northern California are from San Francisco Bay southwards (Nico et al. 2025b) |
| Tridentiger trigonocephalus | Regional list, Allen et al. 2006 | North coast | Reports from Northern California are limited to San Francisco Bay (Nico et al. 2025c) |

**Sup 5 Table 1. List of species excluded from literature comparison.** Species are listed alongside the data source from which they were reported (eDNA, site-specific study, or regional list), the site or region they were excluded from during analysis, and the reason for their exclusion from this site or region.

|  |  |  | **North Coast** | | |  | **Central Coast** | | |  | **South Coast** | | | | | |
| --- | --- | --- | --- | --- | --- | --- | --- | --- | --- | --- | --- | --- | --- | --- | --- | --- |
|  |  |  | **Ten Mile River** | | |  | **Pajaro River** | | |  | **Malibu Lagoon** | |  | **Batiquitos Lagoon** | |  |
|  |  |  |  | **Literature** | |  |  | **Literature** | |  |  | **Literature** |  |  | **Literature** | |
| **Source** | **Species** | **Category** | **eDNA** | **System** | **Region** |  | **eDNA** | **System** | **Region** |  | **eDNA** | **System** |  | **eDNA** | **System** | **Region** |
| eDNA only | Ammodytes personatus | Marine | X |  |  |  |  |  |  |  |  |  |  |  |  |  |
| **Brevoortia**1 | Diadromous | X |  |  |  |  |  |  |  |  |  |  |  |  |  |
| Cheilotrema saturnum | Marine |  |  |  |  |  |  |  |  |  |  |  | X |  |  |
| Cynoscion parvipinnis | Marine migrant |  |  |  |  |  |  |  |  |  |  |  | X |  |  |
| **Cyprinus carpio**2 | Freshwater |  |  |  |  |  |  |  |  | X |  |  |  |  |  |
| Hypanus dipterurus | Marine |  |  |  |  |  |  |  |  |  |  |  | X |  |  |
| Hypsoblennius gilberti | Estuarine |  |  |  |  |  |  |  |  |  |  |  | X |  |  |
| Hypsoblennius jenkinsi | Estuarine |  |  |  |  |  |  |  |  |  |  |  | X |  |  |
| Leuresthes tenuis | Marine migrant |  |  |  |  | X |  |  |  | X |  |  | X |  |  |
| Mola mola | Marine | X |  |  |  |  |  |  |  |  |  |  |  |  |  |
| Paraclinus integripinnis | Marine |  |  |  |  |  |  |  |  | X |  |  |  |  |  |
| Rimicola muscarum | Marine |  |  |  |  |  |  |  |  |  |  |  | X |  |  |
| Sardinops sagax | Marine | X |  |  |  |  |  |  |  | X |  |  | X |  |  |
| Seriphus politus | Marine |  |  |  |  |  |  |  |  |  |  |  | X |  |  |
| Trachurus symmetricus | Marine |  |  |  |  |  |  |  |  |  |  |  | X |  |  |
| Literature only | **Alosa sapidissima** | Diadromous |  |  | X |  |  |  |  |  |  |  |  |  |  |  |
| Amphistichus rhodoterus | Marine |  |  | X |  |  |  |  |  |  |  |  |  |  |  |
| Anchoa delicatissima | Estuarine |  |  |  |  |  |  |  |  |  |  |  |  |  | X |
| Apodichthys flavidus | Marine |  | X |  |  |  |  |  |  |  |  |  |  |  |  |
| Atractoscion nobilis | Marine |  |  |  |  |  |  |  |  |  |  |  |  | X |  |
| Catostomus occidentalis | Freshwater |  |  |  |  |  | X |  |  |  |  |  |  |  |  |
| Embiotocidae3 | Marine |  |  |  |  |  |  | X |  |  |  |  |  | X | X |
| Gibbonsia metzi | Marine |  |  |  |  |  |  |  |  |  |  |  |  | X |  |
| Hesperoleucus symmetricus | Freshwater |  |  | X |  |  |  |  |  |  |  |  |  |  |  |
| Heterostichus rostratus | Marine |  |  |  |  |  |  |  |  |  | X |  |  |  | X |
| Ilypnus gilberti | Estuarine |  |  | X |  |  |  | X |  |  |  |  |  | X |  |
| Lepidogobius lepidus | Estuarine |  |  | X |  |  |  |  |  |  |  |  |  |  | X |
| **Lucania parva** | Freshwater |  |  |  |  |  |  |  |  |  |  |  |  |  | X |
| Microgadus proximus | Marine |  |  | X |  |  |  |  |  |  |  |  |  |  |  |
| Micrometrus minimus | Marine |  |  |  |  |  | X |  |  |  |  |  |  |  | X |
| **Morone americana** | Diadromous |  |  |  |  |  |  | X |  |  |  |  |  |  |  |
| **Morone saxatilis** | Diadromous |  |  |  |  |  | X |  |  |  |  |  |  |  |  |
| Mustelus californicus | Marine |  |  |  |  |  |  | X |  |  |  |  |  | X | X |
| Mustelus henlei | Marine |  |  | X |  |  |  | X |  |  |  |  |  |  |  |
| 1 | Multiple species of Brevoortia were equally attributed to recovered ASVs. | | | | | | | | | | | | | | | |
| 2 | Cyprinus carpio and Carassius auratus were equally attributable to recovered ASVs. For consistency with literature, they are left as Cyprinus carpio here. | | | | | | | | | | | | | | | |
| 3 | Embiotocidae combines specific records of Embiotoca jacksoni from Allen 2006 with the listing of surfperches generally in Garcia 2024. | | | | | | | | | | | | | | | |

**Sup 5 Table 2. Presence-absence of species in four estuaries across eDNA and literature.**

|  |  |  | **North Coast** | | |  | **Central Coast** | | |  | **South Coast** | | | | | |
| --- | --- | --- | --- | --- | --- | --- | --- | --- | --- | --- | --- | --- | --- | --- | --- | --- |
|  |  |  | **Ten Mile River** | | |  | **Pajaro Lagoon** | | |  | **Malibu Lagoon** | |  | **Batiquitos Lagoon** | |  |
|  |  |  |  | **Literature** | |  |  | **Literature** | |  |  | **Literature** |  |  | **Literature** |  |
| **Source** | **Species** | **Category** | **eDNA** | **System** | **Region** |  | **eDNA** | **System** | **Region** |  | **eDNA** | **System** |  | **eDNA** | **System** | **Region** |
| Literature only | Oligocottus maculosus | Marine |  | X |  |  |  |  |  |  |  |  |  |  |  |  |
| Ophiodon elongatus | Marine |  |  |  |  |  |  | X |  |  |  |  |  |  |  |
| Parophrys vetulus | Marine migrant |  | X | X |  |  |  | X |  |  |  |  |  |  |  |
| Phanerodon furcatus | Marine |  |  | X |  |  |  | X |  |  |  |  |  |  | X |
| Pleuronichthys ritteri | Marine |  |  |  |  |  |  | X |  |  |  |  |  |  | X |
| Rhinobatos productus | Marine migrant |  |  |  |  |  |  |  |  |  |  |  |  | X |  |
| Scorpaenichthys marmoratus | Marine |  |  |  |  |  | X | X |  |  |  |  |  |  |  |
| Sebastes4 | Marine |  | X |  |  |  |  | X |  |  |  |  |  |  |  |
| Spirinchus starski | Marine migrant |  | X |  |  |  |  |  |  |  |  |  |  |  |  |
| Symphurus atricaudus | Marine |  |  |  |  |  |  | X |  |  |  |  |  |  |  |
| Syngnathus auliscus | Estuarine |  |  |  |  |  |  |  |  |  |  |  |  |  | X |
| Triakis semifasciata | Marine migrant |  |  | X |  |  |  | X |  |  |  |  |  | X |  |
| **Tridentiger bifasciatus** | Estuarine |  |  |  |  |  |  |  |  |  |  |  |  |  | X |
| **Tridentiger trigonocephalus** | Estuarine |  |  |  |  |  |  |  |  |  |  |  |  |  | X |
| eDNA and literature | **Acanthogobius flavimanus** | Estuarine |  |  | X |  | X | X | X |  |  |  |  |  |  | X |
| Anchoa compressa | Marine | X |  |  |  |  | X |  |  | X |  |  | X |  | X |
| Anisotremus davidsonii | Marine |  |  |  |  |  |  |  |  |  |  |  | X | X |  |
| Atherinops affinis | Marine migrant |  | X | X |  | X | X | X |  | X | X |  | X | X | X |
| Atherinopsis californiensis | Marine |  |  | X |  | X | X | X |  | X |  |  | X | X | X |
| Brachygenys californiensis | Marine |  |  |  |  |  |  |  |  |  |  |  | X | X |  |
| Citharichthys stigmaeus | Marine |  | X | X |  |  |  | X |  | X |  |  | X |  |  |
| Clevelandia ios | Estuarine |  | X | X |  | X | X | X |  | X | X |  | X | X | X |
| Clupea pallasii | Marine | X | X | X |  | X | X | X |  |  |  |  |  |  |  |
| Cottus aleuticus | Freshwater | X |  | X |  | X |  |  |  |  |  |  |  |  |  |
| Cottus asper | Freshwater | X | X | X |  | X | X | X |  |  |  |  |  |  |  |
| **Ctenogobius sagittula** | Estuarine |  |  |  |  |  |  |  |  |  |  |  | X | X |  |
| Cymatogaster aggregata | Marine migrant | X | X | X |  | X | X | X |  |  |  |  | X | X | X |
| Engraulis mordax | Marine | X |  | X |  | X | X | X |  | X |  |  | X | X | X |
| Entosphenus tridentatus5 | Diadromous | X |  | X |  |  |  |  |  |  |  |  |  |  | X |
| Eucyclogobius newberryi | Freshwater | X |  | X |  | X | X | X |  | X | X |  |  |  | X |
| Fundulus parvipinnis | Estuarine |  |  |  |  |  |  | X |  | X | X |  | X | X | X |
| **Gambusia affinis6** | Freshwater | X |  |  |  | X | X | X |  | X | X |  |  |  |  |
| Gasterosteus aculeatus | Freshwater | X | X | X |  | X | X | X |  |  |  |  | X |  |  |
| Gillichthys mirabilis | Marine | X |  | X |  | X | X | X |  | X | X |  | X | X | X |
| 4 | Sebastes combines records of juvenile Sebastes spp. from Osborn 2017 with the listing of rockfishes generally from Allen 2006. | | | | | | | | | | | | | | | |
| 5 | Entosphenus tridentatus and Lampetra ayresii were equally attributable to recovered ASVs. For consistency with literature, they are left as Entosphenus tridentatus here. | | | | | | | | | | | | | | | |
| 6 | Gambusia affinis and holbrooki were equally attributable to some of the recovered ASVs. For consistency with literature, they are left as Gambusia affinis here. | | | | | | | | | | | | | | | |

**Sup 5 Table 2. Presence-absence of species in four estuaries across eDNA and literature (continued from previous page).**

|  |  |  | **North Coast** | | |  | **Central Coast** | | |  | **South Coast** | | | | | |
| --- | --- | --- | --- | --- | --- | --- | --- | --- | --- | --- | --- | --- | --- | --- | --- | --- |
|  |  |  | **Ten Mile River** | | |  | **Pajaro River** | | |  | **Malibu Lagoon** | |  | **Batiquitos Lagoon** | | |
|  |  |  |  | **Literature** | |  |  | **Literature** | |  |  | **Literature** |  |  | **Literature** | |
| **Source** | **Species** | **Category** | **eDNA** | **System** | **Region** |  | **eDNA** | **System** | **Region** |  | **eDNA** | **System** |  | **eDNA** | **System** | **Region** |
|  | Girella nigricans | Marine migrant |  |  |  |  |  |  |  |  |  | X |  | X | X |  |
| Gymnura marmorata | Marine |  |  |  |  |  |  |  |  |  |  |  | X | X |  |
| Hypomesus pretiosus | Marine migrant | X |  | X |  |  |  | X |  |  |  |  |  |  |  |
| Hypsoblennius gentilis | Estuarine |  |  |  |  |  |  |  |  |  |  |  | X | X | X |
| Hypsopsetta guttulata | Marine migrant |  |  | X |  |  | X | X |  | X |  |  | X | X | X |
| Kyphosus azureus | Marine |  |  |  |  |  |  |  |  |  |  |  | X | X |  |
| Lavinia exilicauda | Freshwater |  |  |  |  | X | X |  |  |  |  |  |  |  |  |
| Leptocottus armatus | Estuarine | X | X | X |  | X | X | X |  | X | X |  | X |  | X |
| **Menidia audens7** | Freshwater |  |  |  |  | X |  |  |  | X |  |  |  | X |  |
| Menticirrhus undulatus | Marine migrant |  |  |  |  |  |  |  |  |  |  |  | X | X |  |
| Mugil cephalus | Diadromous |  |  |  |  | X | X |  |  | X | X |  | X | X | X |
| Myliobatis californica | Marine migrant |  |  | X |  |  | X | X |  |  |  |  | X |  | X |
| Oncorhynchus keta | Diadromous | X |  | X |  |  |  |  |  |  |  |  |  |  |  |
| Oncorhynchus kisutch | Diadromous | X | X | X |  | X |  |  |  |  |  |  | X |  |  |
| Oncorhynchus mykiss | Diadromous | X | X | X |  | X |  | X |  |  |  |  |  |  | X |
| Oncorhynchus tshawytscha | Diadromous | X | X | X |  | X |  |  |  |  |  |  |  |  |  |
| Paralabrax clathratus | Marine |  |  |  |  |  |  |  |  |  | X |  | X | X |  |
| Paralabrax maculatofaciatus | Estuarine |  |  |  |  |  |  |  |  |  |  |  | X | X | X |
| Paralabrax nebulifer | Marine |  |  |  |  |  |  |  |  |  | X |  | X | X | X |
| Paralichthys californicus | Marine migrant |  |  | X |  |  | X | X |  |  |  |  | X | X | X |
| Platichthys stellatus | Marine migrant |  | X | X |  | X | X | X |  |  |  |  |  |  |  |
| Porichthys myriaster | Marine |  |  |  |  |  | X |  |  |  |  |  | X |  |  |
| Quietula y-cauda | Estuarine |  |  |  |  |  |  | X |  |  |  |  | X | X | X |
| Roncador stearnsii | Marine migrant | X |  |  |  |  |  |  |  |  |  |  | X | X |  |
| Strongylura exilis | Marine |  |  |  |  |  |  |  |  |  |  |  | X | X |  |
| Syngnathus californiensis8 | Estuarine |  | X | X |  | X | X | X |  |  |  |  | X | X | X |
| Umbrina roncador | Marine migrant |  |  |  |  |  |  |  |  |  |  |  | X | X | X |
| Urobatis halleri | Marine |  |  |  |  |  |  |  |  |  |  |  | X |  | X |
| 7 | Menidia audens and beryllina have identical MiFish-U sequences and are both reported from California. As M. audens are more common, however, observations in eDNA data were labeled M. audens. | | | | | | | | | | | | | | | |
| 8 | We follow Garcia et al. 2019 in synonymizing Syngnathus exilis and leptorhynchus under Syngnathus californiensis. | | | | | | | | | | | | | | | |

**Sup 5 Table 2. Presence-absence of species in four estuaries across eDNA and literature (continued from previous page).** “X”s indicate that a species is present in a particular location from a given data source. Species in bold are non-native.

**Literature Cited**

Adams PB, Grimes C, Hightower JE, Lindley ST, Moser ML, Parsley MJ (2007) Population status of North American green sturgeon, *Acipenser medirostris*. Environ Biol Fish 79:339-356. https://doi.org/10.1007/s10641-006-9062-z

Allen LG, Yoklavich MM, Cailliet GM, Horn MH (2006) Bays and estuaries. In: Allen LG, Pondella DJ, Horn MH (eds) The ecology of marine fishes: California and adjacent waters. University of California Press, Berkeley, pp 119-148

Ambrose RF, Meffert DJ (1999) Fish-assemblage dynamics in Malibu Lagoon, a small, hydrologically altered estuary in Southern California. Wetlands 19:327-340. https://doi.org/10.1007/BF03161764

Carim KJ, Larson DC, Helstab JM, Young MK, Docker MF (2023) A revised taxonomy and estimate of species diversity for western North American *Lampetra*. Environ Biol Fish 106:817-836. https://doi.org/10.1007/s10641-023-01397-y

DW Alley & Associates (2012) Pajaro Lagoon steelhead and tidewater goby sampling report – 2012. Prepared for Santa Cruz County Flood Control and Water Conservation District

DW Alley & Associates (2013) 2013 Santa Cruz County Fishery Report. Prepared for Santa Cruz County Flood Control and Water Conservation District

DW Alley & Associates (2014) 2014 Santa Cruz County Fishery Report. Prepared for Santa Cruz County Flood Control and Water Conservation District

DW Alley & Associates (2015) 2015 Santa Cruz County Fishery Report. Prepared for Santa Cruz County Flood Control and Water Conservation District

DW Alley & Associates (2016) 2016 Santa Cruz County Fishery Report. Prepared for Santa Cruz County Flood Control and Water Conservation District

DW Alley & Associates (2017) Fishery and water quality monitoring of Pajaro River Lagoon in 2017. Prepared for Santa Cruz County Flood Control and Water Conservation District

DW Alley & Associates (2018) Fishery and water quality monitoring of Pajaro River Lagoon in 2018. Prepared for Santa Cruz County Flood Control and Water Conservation District

DW Alley & Associates (2019) Fishery and water quality monitoring of Pajaro River Lagoon/Estuary in 2019. Prepared for Santa Cruz County Flood Control and Water Conservation District

DW Alley & Associates (2020) Fishery and water quality monitoring of Pajaro River Lagoon/Estuary, 2020. Prepared for Santa Cruz County Flood Control and Water Conservation District

DW Alley & Associates (2021) Fishery and water quality monitoring of Pajaro River Lagoon/Lagoon, 2021. Prepared for Santa Cruz County Flood Control and Water Conservation District

DW Alley & Associates (2022) Fishery and water quality monitoring of Pajaro River Lagoon, 2022. Prepared for Santa Cruz County Flood Control and Water Conservation District

DW Alley & Associates (2023) Fishery and water quality monitoring of Pajaro River Estuary, 2023. Prepared for Santa Cruz County Flood Control and Water Conservation District

Garcia SDJ (2024) Fish community structure relative to fishing pressure and protection status in Southern California estuaries. Dissertation, California State University Long Beach.

Garcia E, Rice CA, Eernisse DJ, Forsgren KL, Quimbayo JP, Rouse GW (2019) Systematic relationships of sympatric pipefishes (*Syngnathus* spp.): A mismatch between morphological and molecular variation. J Fish Biol 95:999-1012. https://doi.org/10.1111/jfb.14073

Hildebrand LR, Drauch Schreier A, Lepla K, McAdam SO, McLellan J, Parsley MJ, Paragamian VL, Young SP (2016) Status of White Sturgeon (*Acipenser transmontanus* Richardson, 1863) throughout the species range, threats to survival, and prognosis for the future. J Appl Ichthyol 32:261-312. https://doi.org/10.1111/jai.13243

Fuller P (2025) *Hypomesus nipponensis* McAllister, 1963. USGS Nonindigenous Aquatic Species Database. https://nas.er.usgs.gov/queries/FactSheet.aspx?speciesID=794. Accessed 06 April 2025

Fuller P, Neilson M (2025) *Lucania parva* (Baird and Girard in Girard, 1855). USGS Nonindigenous Aquatic Species Database. https://nas.er.usgs.gov/queries/FactSheet.aspx?SpeciesID=697. Accessed 06 April 2025

Moyle PB (2002) Inland fishes of California: Revised and expanded. University of California Press, Berkeley.

Nico L, Fuller P, Neilson M (2025a) *Tridentiger barbatus* (Gunther, 1861). USGS Nonindigenous Aquatic Species Database. https://nas.er.usgs.gov/queries/FactSheet.aspx?SpeciesID=715. Accessed 06 April 2025

Nico L, Fuller P, Neilson M (2025b) *Tridentiger bifasciatus* Steindachner, 1881. USGS Nonindigenous Aquatic Species Database. https://nas.er.usgs.gov/queries/FactSheet.aspx?speciesID=716. Accessed 06 April 2025

Nico L, Fuller P, Neilson M (2025c) *Tridentiger trigonocephalus* (Gill, 1859). USGS Nonindigenous Aquatic Species Database. https://nas.er.usgs.gov/queries/FactSheet.aspx?speciesID=717. Accessed 06 April 2025

Osborn K (2017) Seasonal fish and invertebrate communities in three northern California estuaries. Dissertation, Humboldt State University

Saglam IK, Hobbs J, Baxter R, Lewis LS, Benjamin A, Finger AJ (2021) Genome-wide analysis reveals regional patterns of drift, structure, and gene flow in longfin smelt (*Spirinchus thaleichthys*) in the northeastern Pacific. Can J Fish Aquat Sci 78:1793-1804. https://dx.doi.org/10.1139/cjfas-2021-0005

Willson MF, Armstrong RH, Hermans MC, Koski K (2006) Eulachon: A review of biology and an annotated bibliography. Report for Alaska Fisheries Science Center (2006-12)
