# Supplementary material for: Efficacy of environmental DNA metabarcoding in monitoring fish faunas in California estuaries and lagoons: a preliminary assessment
Source: Research Square preprint supplement (doi:10.21203/rs.3.rs-6436175/v1), 2025-07-07
Supplement: Supplementary file 5 [file bb5918028ee1198a5cb28ca2.docx]

**Supplement 2. Taxonomic assignment**

| **Anacapa assignment** | **Reason for assessment** | **Updated assignment** | **Reason for reassignment** | **ASVs** | **Notes** | **References** |
| --- | --- | --- | --- | --- | --- | --- |
| Ammodytes sp. | Not to species level | Ammodytes personatus | BLAST result, geographic range | 1 | BLAST to both A. personatus and A. japonicus. A. personatus is more likely given geographic range, as A. japonicus is endemic to the waters of Japan. | Orr et al. 2015 |
| Anisotremus davidsonii | <95% confidence | no change | BLAST result | 5 |  |  |
| Batracottus baicalensis | <95% confidence | Cottus asper | BLAST result, tree topology, geographic range | 2 | See Supp 2 Fig 1 |  |
| Brevoortia gunteri | Not known from CA | Brevoortia sp. | BLAST result | 1 | BLAST to both B. tyrannus and B. patronus. Both are Atlantic taxa not known from California, so we cannot definitively assign the ASV to either species. We labeled this ASV as Brevoortia sp. to reflect this. | Reintjes 1969, Ballenger 2014 |
| Clupea harengus | <95% confidence, not known from CA | Clupea pallasii | BLAST result, geographic range | 10 | ASVs marked with an asterisk BLAST to both C. pallasii and C. harengus. C. pallasii is more likely given geographic range, as C. harengus is an Atlantic species. | Hay et al. 2001 |
| Comephorus baikalensis | <95% confidence | Cottus asper | BLAST result, tree topology, geographic range | 1 | See Supp 2 Fig 1 |  |
| Cottus hangionensis | <95% confidence | Cottus asper | BLAST result, tree topology, geographic range | 3 | See Supp 2 Fig 1 |  |
| Cottus poecilopus | <95% confidence | Cottus asper | BLAST result, tree topology, geographic range | 1 | See Supp 2 Fig 1 |  |
| Cottus pollux | <95% confidence | Cottus aleuticus | BLAST result, tree topology, geographic range | 4 | See Supp 2 Fig 1 |  |
| Cottus pollux | <95% confidence | Cottus asper | BLAST result, tree topology, geographic range | 1 | See Supp 2 Fig 1 |  |
| Cottus sp. | Not to species level | Cottus asper | BLAST result, tree topology | 25 | See Supp 2 Fig 1 |  |
| Cottus sp. | Not to species level | Cottus aleuticus | BLAST result, tree topology, geographic range | 1 | See Supp 2 Fig 1 |  |
| Cottus sp. | Not to species level | Cottus sp. | BLAST result, tree topology, geographic range | 1 | See Supp 2 Fig 1 |  |
| Ctenogobius saepepallens | <95% confidence | Ctenogobius sagittula | BLAST result | 2 |  |  |
| Cynoscion regalis | <95% confidence | Cynoscion parvipinnis | BLAST result | 1 |  |  |

**Sup 2 Table 1. Explanations for ASV reassignments.**

| **Anacapa assignment** | **Reason for assessment** | **Updated assignment** | **Reason for reassignment** | **ASVs** | **Notes** | **References** |
| --- | --- | --- | --- | --- | --- | --- |
| Cyprinus carpio | <95% confidence | Cyprinus carpio† (or Carassius auratus) | BLAST result, geographic range | 2 | BLAST to C. carpio and subspecies, C. carpio hybrids, C. acutidorsalis, C. pellegrini, Carassius auratus hybrids, Procypris mera, and Pseudorasbora parva. C. carpio or Carassius auratus are more likely given geographic range, as C. acutidorsalis, C. pellegrini, and Pseudorasbora parva are not reported from the US, and Procypris mera is endemic to the Pearl River in Asia. We labeled these ASVs as C. carpio to retain comparability with species lists from literature, but cannot definitively assign them to either C. carpio or C. auratus. | USFW 2018, USFW 2019a, USFW 2019b, He et al. 2022 |
| Gambusia affinis | <95% confidence | no change | BLAST result | 2 |  |  |
| Gambusia holbrooki | <95% confidence | Gambusia affinis (or Gambusia holbrooki) | BLAST result, geographic range | 2 | BLAST to G. affinis and G. holbrooki. Some sources suggest only G. affinis were introduced to CA, so we labeled these ASVs as G. affinis. This was consistent with species lists from literature. However, other sources report observations of G. holbrooki in CA, as well as hybridization between the two species, so we cannot definitively assign the ASVs to either species. | Walton et al. 2012, Srean 2015, Shapovalov et al. 1981 |
| Gasterosteus aculeatus | <95% confidence | no change | BLAST result | 22 |  |  |
| Gillichthys mirabilis | <95% confidence | Clevelandia ios | BLAST result | 2 |  |  |
| Gobio gobio | Not known from CA | no change | BLAST result | 1 | Beneath 20 read threshold |  |
| Hypanus dipterurus | <95% confidence | no change | BLAST result | 1 |  |  |
| Hypomesus sp. | Not to species level | Hypomesus pretiosus | BLAST result, geographic range | 1 | BLAST to H. pretiosis and H. transpacificus. H. pretiosus is more likely given geographic range, as H. transpacificus is endemic only to the San Joaquin River drainage. | Fuller and Neilson 2025a |
| Inu ama | <95% confidence | Clevelandia ios | BLAST result | 1 |  |  |
| Lepidogobius lepidus | <95% confidence | Eucyclogobius newberryi | BLAST result | 2 |  |  |
| Leptocottus armatus | <95% confidence | no change | BLAST result | 15 |  |  |

**Sup 2 Table 1. Explanations for ASV reassignments (continued from previous page).**

| **Anacapa assignment** | **Reason for assessment** | **Updated assignment** | **Reason for reassignment** | **ASVs** | **Notes** | **References** |
| --- | --- | --- | --- | --- | --- | --- |
| Menidia sp. | Not to species level | Menidia audens (or Menidia beryllina) | BLAST result, geographic range | 5 | BLAST to M. audens, M. beryllina, and M. peninsulae. M. audens or M. beryllina are more likely given geographic range, as M. peninsulae is specific to the Gulf of Mexico. While both M. audens and M. beryllina are known from CA, M. audens is more widely reported, so we labeled these ASVs as M. audens. This was consistent with species lists from literature. However, these ASVs cannot definitively be assigned to either M. audens or M. beryllina (which are considered to be the same species by some workers). | Chernoff et al. 1981, Dill and Cordone 1997, Fluker et al. 2011, Swift et al. 2014 |
| Mola mola | <95% confidence | no change | BLAST result | 2 |  |  |
| Myzopsetta sp. | Not to species level | Platichthys stellatus | BLAST result, geographic range | 1 | BLAST to P. stellatus, P. flesus, Liopsetta glacialis, and Myzopsetta ferruginea. P. stellatus is more likely given geographic range, as P. flesus has not been introduced to CA, Liopsetta glacialis is found in Arctic waters, and Myzopsetta ferruginea is an Atlantic taxon. | Gill 1873, Chernova 2011, Fuller and Neilson 2025b |
| Oncorhynchus keta | <95% confidence | no change | BLAST result | 1 |  |  |
| Oncorhynchus kisutch | <95% confidence | no change | BLAST result | 5 |  |  |
| Oncorhynchus mykiss | <95% confidence | no change | BLAST result, geographic range | 9 | BLAST to O. mykiss, O. chrysogaster, O. gilae, and O. clarkii. O. mykiss is more likely given geographic range, as O. chrysogaster is endemic to Mexico, O. gilae is far inland in Arizona and New Mexico, and O. clarkii is not known from any of our study sites. | Hendrickson et al. 2006, Fuller 2025, Fuller and Daniel 2025 |
| Oncorhynchus tshawytscha | <95% confidence | no change | BLAST result | 1 |  |  |
| Paracottus knerii | <95% confidence | Cottus asper† | BLAST result, tree topology, geographic range | 1 | See Supp 2 Fig 1 |  |
| Paralabrax clathratus | <95% confidence | no change | BLAST result | 1 |  |  |
| Paralabrax nebulifer | <95% confidence | no change | BLAST result | 1 |  |  |

**Sup 2 Table 1. Explanations for ASV reassignments (continued from previous page).**

| **Anacapa assignment** | **Reason for assessment** | **Updated assignment** | **Reason for reassignment** | **ASVs** | **Notes** | **References** |
| --- | --- | --- | --- | --- | --- | --- |
| Petromyzontidae | <95% confidence | Entosphenus tridentatus† (or Lampetra ayresii) | BLAST result, geographic range, updated phylogeny | 2 | BLAST to E. tridentatus, E. lethophagus, E. similis, E. minimus, L. ayresii, and L. richardsonii. E. tridentatus or L. ayresii are more likely given geographic range, as E. lethophagus and E. similis are endemic to the Pit-Klamath River system and E. minimus is endemic to Miller Lake in Oregon. L. richardsonii is synonymized with L. ayresii. We labeled these ASVs as E. tridentatus to retain comparability with species lists from literature, but cannot definitively assign them to either E. tridentatus or L. ayresii. | Moyle 2002, Carim et al. 2023 |
| Ptychogheilus oregonensis | <95% confidence | Lavinia exilicauda | BLAST result | 1 | - |  |
| Sardinops sp. | Not to species level | Sardinops sagax | BLAST result, geographic range | 6 | BLAST to S. sagax and S. melanostictus. S. sagax is more likely given geographic range, as S. melanostictus is a western Pacific taxon. | Sarr et al. 2021 |
| Syngnathus exilis | <95% confidence | Syngnathus californiensis | BLAST result, updated phylogeny | 1 | BLAST to S. exilis. Recent phylogenies synonymze S. exilis with S. californiensis. | Garcia et al. 2019 |
| Syngnathus sp. | Not to species level | Syngnathus californiensis | BLAST result, updated phylogeny | 1 | BLAST to S. euchrous, S. leptorhynchus, and S. californiensis. Recent phylogenies synonymize S. euchrous and S. leptorhynchus with S. californiensis. | Garcia et al. 2019 |
| Trachurus symmetricus | <95% confidence | no change | BLAST result | 2 |  |  |

**Sup 2 Table 1. Explanations for ASV reassignments.**


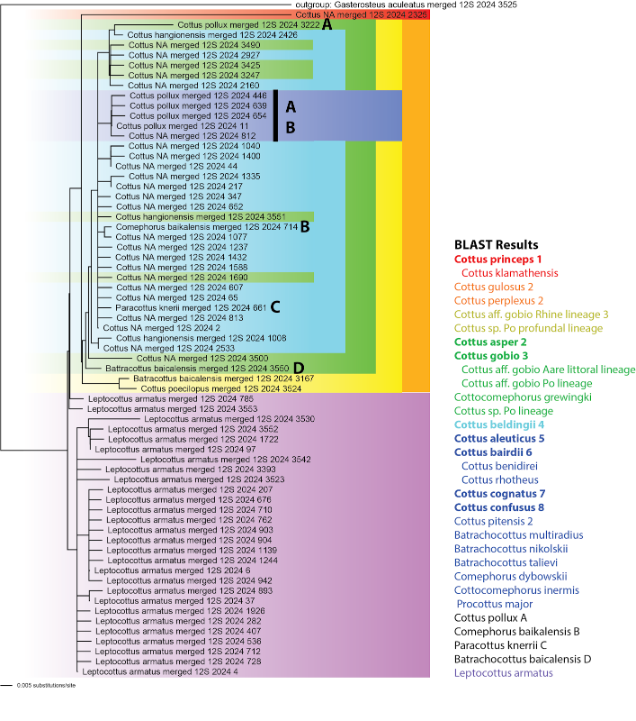


**Sup 2 Figure 1. Annotated phylogram of cottid ASVs recovered from MiFish-U metabarcoding and associated BLAST results.** Each terminus on the phylogram represents a unique ASV with its original taxonomic assignment by Anacapa. We queried ASVs against NCBI’s core nucleotide database using BLAST, and recorded the alignment(s) with the lowest E-value for each ASV. In many cases, multiple alignments to different species produced the same low E-value for a single ASV. These species often occurred in “groups”–i.e. if an ASV aligned to one species, it would also align to other species within the same “group.” These groups are represented as colors in the figure, with overlapping colors corresponding to overlap between groups. For example, ASVs aligning to species in the green group also align to species in the yellow and orange groups, but not to species in the red, light blue, or dark blue groups. Species in each color group are listed under “BLAST Results.” In this list, *Cottus* species complexes (see Young et al. 2022) are indicated through indentation and/or numbering. 1 represents the *C. princeps* species complex, which also contains *C. klamathensis*. 2 represents the *C. asper* complex, which also contains *C. gulosus*, *perplexus*, and *pitensis*. 3 represents the *C. gobio* complex, which contains multiple *C. gobio* lineages. 4, 5, 6, 7, and 8 represent the *C. beldingii*, *aleuticus*, *bairdii*, *cognatus*, and *confusus* complexes, respectively. Lettered species in black do not correspond to any color group or species complex. ASVs in the purple group were confidently assigned to *Leptocottus armatus*.

For the purpose of this study, we assigned ASVs in the dark blue group as *C. aleuticus* and ASVs in yellow, green, and light blue groups as *C. asper*. While these assignments remain ambiguous, *C. aleuticus* and *C. asper* are the only two *Cottus* species known to occupy the region of our study sites, and seem to separate out in our annotated phylogram. We could not assign the ASV in the red group to a specific *Cottus* species, as BLAST alignments were below I = 95% to species not known from our study region.

|  |  |  | **Ten Mile River (18)** | |  | **Pajaro River (17)** | |  | **Malibu Lagoon (18)** | |  | **Batiquitos Lagoon (16)** | |
| --- | --- | --- | --- | --- | --- | --- | --- | --- | --- | --- | --- | --- | --- |
| **Species** |  | **ASV ID** | **Spring (9)** | **Fall (9)** | | **Spring (9)** | **Fall (8)** | | **Spring (9)** | **Fall (9)** | | **Spring (8)** | **Fall (8)** |
| Leptocottus armatus |  | 4 | 5 | 1 | | 9 | 6 | | 6 | 1 | | 2 | 1 |
|  |  | 6 |  |  |  | 9 | 5 | | 9 | 1 | |  |  |
|  |  | 37 |  |  |  | 6 |  |  | 3 | 1 | |  |  |
|  |  | 97 |  |  |  | 2 | 3 | |  |  |  |  |  |
|  |  | 207 |  |  |  | 1 |  |  |  |  |  |  |  |
|  |  | 282 |  |  |  | 1 |  |  |  |  |  |  |  |
|  |  | 407 | 1 |  |  |  |  |  |  |  |  |  |  |
|  |  | 536 |  |  |  | 1 |  |  |  |  |  |  |  |
|  |  | 676 |  |  |  |  |  |  | 1 |  |  |  |  |
|  |  | 710 |  |  |  | 1 |  |  |  |  |  |  |  |
|  |  | 712 | 1 |  |  |  | 1 | |  |  |  |  |  |
|  |  | 728 |  |  |  |  | 1 | |  |  |  |  |  |
|  |  | 762 |  |  |  |  |  |  | 1 |  |  |  |  |
|  |  | 785 |  |  |  | 1 |  |  |  |  |  |  |  |
|  |  | 893 |  |  |  |  |  |  | 1 |  |  |  |  |
|  |  | 903 |  |  |  |  |  |  | 1 |  |  |  |  |
|  |  | 904 |  |  |  | 1 |  |  |  |  |  |  |  |
|  |  | 942 |  |  |  |  |  |  | 1 |  |  |  |  |
|  |  | 1139 |  |  |  | 1 |  |  |  |  |  |  |  |
|  |  | 1244 |  |  |  | 1 |  |  |  |  |  |  |  |
|  |  | 1722 |  |  |  |  | 1 | |  |  |  |  |  |
|  |  | 1926 |  |  |  | 1 |  |  |  |  |  |  |  |
|  |  | 3393 |  |  |  | 1 |  |  |  |  |  |  |  |
|  |  | 3523 |  |  |  | 1 |  |  |  |  |  |  |  |
|  |  | 3530 |  |  |  |  | 1 | |  |  |  |  |  |
|  |  | 3542 |  |  |  |  |  |  | 1 |  |  |  |  |
|  |  | 3552 |  |  |  | 1 |  |  |  |  |  |  |  |
|  |  | 3553 |  |  |  | 1 |  |  |  |  |  |  |  |
| Total L. armatus reads | | | 28601 | 932340 |  | 215212 | 191 |  | 5857 | 67790 |  | 7747 | 47 |

| % of L. armatus reads | | | | | | | | | |
| --- | --- | --- | --- | --- | --- | --- | --- | --- | --- |
| > 0.001% | > 0.01% | > 0.1% | > 1% | > 10% | > 20% | > 30% | > 50% | > 70% | 100% |

**Sup 2 Table 2. Percent reads and number of replicates of *Leptocottus armatus* ASVs for study sites and seasons.** Numbers in cells indicate the number of replicates positive for a particular ASV in each site and season. Numbers in parentheses after site names are the total number of replicates in each site and season. Cell colors represent the percentage of total *L. armatus* reads made up by a particular ASV in each site and season, with correspondence explained by the key at the bottom of the table.

|  |  |  | **Ten Mile River (18)** | |  | **Pajaro River (17)** | |  | | **Malibu Lagoon (18)** | |  | **Batiquitos Lagoon (16)** | |
| --- | --- | --- | --- | --- | --- | --- | --- | --- | --- | --- | --- | --- | --- | --- |
| **Category** | **ASV_IDs** | **# ASVs** | **Spring (9)** | **Fall (9)** |  | **Spring (9)** | **Fall (8)** | | **Spring (9)** | | **Fall (9)** |  | **Spring (8)** | **Fall (8)** |
| Birds | Anas sp.¹ | 3 | 2 |  |  | 2 | 1 | | | 5 | 4 | |  |  |
|  | Mareca sp.² | 2 |  | 2 | | 4 | 1 | | | 5 |  |  |  |  |
|  | Aphelocoma coerulescens | 1 | 1 |  |  |  |  |  | |  |  |  |  |  |
|  | Melanitta deglandi³ | 3 |  | 2 | |  |  |  | |  |  |  |  |  |
|  | Fulica americana | 1 |  | 1 | |  |  |  | | 5 | 1 | |  |  |
|  | Branta canadensis | 1 |  | 4 | |  | 1 | | | 2 |  |  |  |  |
|  | Hirundo rustica | 1 |  |  |  |  |  |  | | 1 |  |  |  |  |
|  | Recurvirostra americana | 1 |  |  |  |  |  |  | | 1 |  |  |  |  |
|  | Pelecanus occidentalis | 3 |  | 2 | |  | 3 | | |  |  |  |  |  |
|  | Mergus squamatus | 1 |  |  |  |  |  |  | | 1 |  |  |  |  |
|  | Aix sponsa | 1 | 1 |  |  |  |  |  | |  |  |  |  |  |
|  | Bucephala albeola | 1 |  |  |  | 1 |  |  | |  |  |  |  |  |
|  | Corthylio calendula | 1 |  | 1 | |  |  |  | |  |  |  |  |  |
|  | Larus sp.⁴ | 1 |  |  |  |  |  |  | | 1 |  |  |  |  |
|  | Numenius phaeopus | 1 |  |  |  |  |  |  | | 1 |  |  |  |  |
|  | Nannopterum auritus | 2 |  |  |  |  | 1 | | |  |  |  |  |  |
|  | Podilymbus podiceps | 1 |  | 1 | |  |  |  | |  |  |  |  |  |
| Mammals | Homo sapiens | 12 | 2 | 1 | |  | 1 | | |  | 1 | |  | 1 |
|  | Phoca vitulina⁵ | 1 | 4 | 2 | |  |  |  | |  |  |  |  |  |
|  | Canis lupus | 1 | 1 |  |  |  |  |  | |  |  |  |  |  |
|  | Rattus rattus | 1 |  | 1 | |  |  |  | |  |  |  |  |  |
|  | Procyon lotor | 1 |  |  |  | 1 |  |  | |  |  |  |  |  |
| Amphibians | Dicamptodon tenebrosus | 2 | 1 | 1 | |  |  |  | |  |  |  |  |  |
| Total sample reads | | | 2,173,699 | 789,861 | | 1,186,647 | 611,322 | | 779,954 | | 636,151 |  | 871,925 | 665,634 |
| Percent of total sample reads | | | > 0.001% | > 0.01% | | > 0.1% | > 1% | | |  |  |  |  |  |
| 1 | BLAST with equal similarity to multiple Anas species | | | | | | | | | | | | | |
| 2 | BLAST with equal similarity to multiple Mareca species | | | | | | | | | | | | | |
| 3 | BLAST with equal similarity to Melanitta deglandi and M. stejneri, but M. deglandi more likely in CA | | | | | | | | | | | | | |
| 4 | BLAST with equal similarity to multiple Larus species, but not L. occidentalis | | | | | | | | | | | | | |
| 5 | BLAST with equal similarity to Phoca vitulina and P. largha, but P. vitulina more likely in CA | | | | | | | | | | | | | |

**Sup 2 Table 3. Percent reads and number of replicates ofnon-fish vertebrate ASVs for study sites and seasons.** Numbers in cells indicate the number of replicates positive for a particular ASV in each site and season. Numbers in parentheses after site names are the total number of replicates in each site and season. Cell colors represent the percentage of total sample reads made up by a particular ASV in each site and season, with correspondence explained by the key at the bottom of the table.

Although this paper focuses on fish taxa, we also recovered 43 ASVs representing 23 non-fish vertebrate species after data cleaning. Of these, 25 ASVs were from birds (17 genera), 16 from mammals (five species), and two from amphibians (one species). Overall, species were typical of those found in or near estuaries, including aquatic birds (six ducks, two waders, one gull, one goose, one grebe, one pelican, one cormorant) and mammals such as harbor seals, raccoons, and humans. Other species removed by data cleaning include *Larus occidentalis*, *Larus canus*, *Neotoma fuscipes*, *Neotoma mexicana*, *Nycticorax nycticorax*, *Pseudacris regilla*, *Zalophus californianius*.

**Literature Cited**

Ballenger JC (2014) Atlantic menhaden. In: South Carolina Department of Natural Resources (eds) South Carolina’s State Wildlife Action Plan (SWAP) 2015: Supplemental volume: Species of conservation concern

Carim KJ, Larson DC, Helstab JM, Young MK, Docker MF (2023) A revised taxonomy and estimate of species diversity for western North American *Lampetra*. Environ Biol Fish 106:817-836. https://doi.org/10.1007/s10641-023-01397-y

Chernoff B, Conner JV, Bryan CF (1981) Systematics of the *Menidia beryllina* complex (Pisces: Atherinidae) from the Gulf of Mexico and its tributaries. Copeia 2:319-336

Chernova NV (2011) Distribution patterns and chorological analysis of fish fauna of the arctic region. J Ichthyol 51:825-924. https://doi.org/10.1134/S0032945211100043

Dill WA, Cordone AJ (1997) History and status of introduced fishes in California, 1871-1996. Fish Bull 178:1-414

Fluker BL, Pezold F, Minton RL (2011) Molecular and morphological divergence in the inland silverside (*Menidia beryllina*) along a freshwater-estuarine interface. Environ Biol Fish 91:311-325. https://doi.org/10.1007/s10641-011-9786-2

Fuller P (2025) *Oncorhynchus clarkii* (Richardson, 1836). USGS Nonindigenous Aquatic Species Database. https://nas.er.usgs.gov/queries/FactSheet.aspx?SpeciesID=890. Accessed 06 April 2025

Fuller P, Daniel WM (2025) Oncorhynchus gilae (Miller, 1950). USGS Nonindigenous Aquatic Species Database. https://nas.er.usgs.gov/queries/factsheet.aspx?SpeciesID=905. Accessed 06 April 2025

Fuller P, Neilson M (2025a) *Hypomesus transpacificus* McAllister, 1963. USGS Nonindigenous Aquatic Species Database. https://nas.er.usgs.gov/queries/FactSheet.aspx?SpeciesID=795. Accessed 06 April 2025

Fuller P, Neilson M (2025b) *Platichthys flesus* (Linnaeus, 1758). USGS Nonindigenous Aquatic Species Database.

Garcia E, Rice CA, Eernisse DJ, Forsgren KL, Quimbayo JP, Rouse GW (2019) Systematic relationships of sympatric pipefishes (*Syngnathus* spp.): A mismatch between morphological and molecular variation. J Fish Biol 95:999-1012. https://doi.org/10.1111/jfb.14073

Gill T (1873) Catalogue of the fishes of the east coast of North America. Smithsonian Institution, Washington. https://nas.er.usgs.gov/queries/FactSheet.aspx?SpeciesID=841. Accessed 06 April 2025

Hay DE, Toresen R, Stephenson R, Thompson M, Claytor R, Funk F, Ivshina E, Jakobsson J, Kobayashi T, McQuinn I, Melvin G, Molloy J, Naumenko N, Oda KT, Parmanne R, Power M, Radchenko V, Schweigert J, Simmonds J, Sjostrand B, Stevenson DK, Tanasichuk R, Tang Q, Watters DL, Wheeler J (2001) Taking stock: An inventory and review of world herring stocks in 2000. In: Funk F, Blackburn J, Hay D, Paul AJ, Stephenson R, Toresen R, Witherell (eds) Proceedings of the symposium Herring 2000: Expectations for a new millennium. University of Alaska Sea Grant College Program, Fairbanks, pp. 381-454

He J, Wu Z, Huang L, Gao M, Liu H, Sun Y, Rad S, Du L (2022) Diversity, distribution, and biogeography of freshwater fishes in Guangxi, China. Animals 12:1262. https://doi.org/10.3390/ani12131626

Hendrickson DA< Perez HE, Findley LT, Forbes W, Tomelleri JR, Mayden RL, Nielsen JL, Jensen B, Ruiz Campos G, Varela Romero A, van der Heiden A, Camarena F, Garcia de Leon FJ (2022) Mexican native trouts: A review of their history and current systematic and conservation status. Rev Fish Biol Fish 12:273-316.

Moyle PB (2002) Inland fishes of California: Revised and expanded. University of California Press, Berkeley.

Orr JW, Wildes S, Kai Y, Raring N, Nakabo T, Katugin O, Guyon J (2011) Systematics of North Pacific sand lances of the genus *Ammodytes* based on molecular and morphological evidence, with the description of a new species from Japan. Fish Bull 113:129-156. http://doi.org/10.7755/FB.113.2.3

Reintjes JW (1969) Synopsis of biological data on the Atlantic menhaden, Brevoortia tyrannus. FAO Fish Synopsis 42:1-30.

Sarr O, Kingdom R, Tian S (2021) Knowledge on the biological and fisheries aspects of the Japanese sardine, *Sardinops melanostictus* (Schlegel, 1846). J Mar Sci Eng 9:1403. https://doi.org/10.3390/jmse9121403

Shapovalov L, Cordone AJ, Dill WA (1981) A list of the freshwater and anadromous fishes of california. Calif Fish Game 67:4-38

Srean P (2015) Understanding the ecological success of two worldwide fish invaders (*Gambusia holbrooki* and *Gambusia affinis*). Dissertation, Universitat de Girona

Swift CC, Howard S, Mulder J, Pondella DJ, Keegan TP (2014) Expansion of the non-native Mississippi silverside, *Menidia audens* (Pisces, Atherinopsidae), into fresh and marine waters of coastal Southern California. Bull South Calif Acad Sci 113:153-164. https://doi.org/10.3160/0038-3872-113.3.153

U.S. Fish and Wildlife Services (USFW) (2018) Barbless carp (*Cyprinus pellegrini*): Ecological risk screening summary. USFW. https://www.fws.gov/sites/default/files/documents/Ecological-Risk-Screening-Summary-Barbless-Carp.pdf. Accessed 06 April 2025

USFW (2019a) *Cyprinus acutidorsalis* (a carp, no common name): Ecological risk screening summary. USFW. https://www.fws.gov/sites/default/files/documents/Ecological-Risk-Screening-Summary-Cyprinus-acutidorsalis-carp.pdf. Accessed 06 April 2025

USFW (2019b) Stone moroko (*Pseudorasbora parva*): Ecological risk screening summary. USFW. https://www.fws.gov/sites/default/files/documents/Ecological-Risk-Screening-Summary-Stone-Moroko.pdf. Accessed 06 April 2025

Walton WE, Henke JA, Why AM (2012) *Gambusia affinis* (Baird & Girard) and *Gambusia holbrooki* Girard (mosquitofish). In: Francis RA (ed) A handbook of global freshwater invasive species. Routledge, London, pp 261-273

Young MK, Smith R, Pilgrim KL, Isaak DJ, McKelvey KS, Parkes S, Egge J, Schwartz MK (2022) A molecular taxonomy of *Cottus* in western North America. West North Am Nat 82:307-345. https://doi.org/10.3398/064.082.0208
